# Supplementary material
Source: publisher figshare collection journal article supplement (https://springernature.figshare.com/ndownloader/files/17030141)
Supplement: Supplementary file 1 [file 17030141]

**Additional file 1**

**Underground transfer of carbonised organic residues to lithics during fire experiments: implications for archaeology**

**Lyn Wadley1, Susan Luong2, Christine Sievers3, Linda Prinsloo1**

**Table S1. Experiments 1 and 2: Items placed underground on sedges.**

| **Item # in Experiment 1 (dry sedge)** | **Item # in Experiment 2 (fresh sedge)** |
| --- | --- |
| Quartz #1 | Quartz #1 |
| Quartz #2 | Quartz #2 |
| Shale #3 | Quartz #3 |
| Opaline #4 | Hornfels #4 |
| Giraffe vertebrae bone fragments #21-26 | Quartzite #5 |
| Kudu neck bone fragments #27-35 | Shale #6 |
|  | Giraffe vertebrae bone fragments #21-26 |
|  | Kudu neck bone fragments #27-35 |
